# Supplementary material for: A novel highly sensitive soy aptasensor for antigen β-conglycinin determination
Source: Royal Society of Chemistry journal article supplement (doi:10.1039/d1ay00701g), 2021-01-01
Supplement: d1ay00701g1.pdf [file d1ay00701g1.pdf]

1

## Supplementary Information

# 2 **A novel highly sensitive soy aptasensor for antigen $\beta$ -conglycinin** 3 **determination**

4 Guohui Li<sup>a,b,#</sup>, Yafeng Wei<sup>a,b,#</sup>, Lizhou Ma<sup>a,b</sup>, Yin Mao<sup>a,b</sup>, Ran Xun<sup>a,b</sup>, Yu Deng<sup>a,b,\*</sup>

5 <sup>a</sup> National Engineering Laboratory for Cereal Fermentation Technology (NELCF), Jiangnan University,

6 1800 Lihu Road, Wuxi, Jiangsu 214122, China

7 <sup>b</sup> School of Biotechnology, Jiangnan University, 1800 Lihu Rd, Wuxi, Jiangsu 214122, China

8

9 <sup>#</sup> Guohui Li and Yafeng Wei contributed equally to this work

10 <sup>\*</sup>Corresponding author. Phone: +86-510-85329031

11 *E-mail address:* dengyu@jiangnan.edu.cn

12

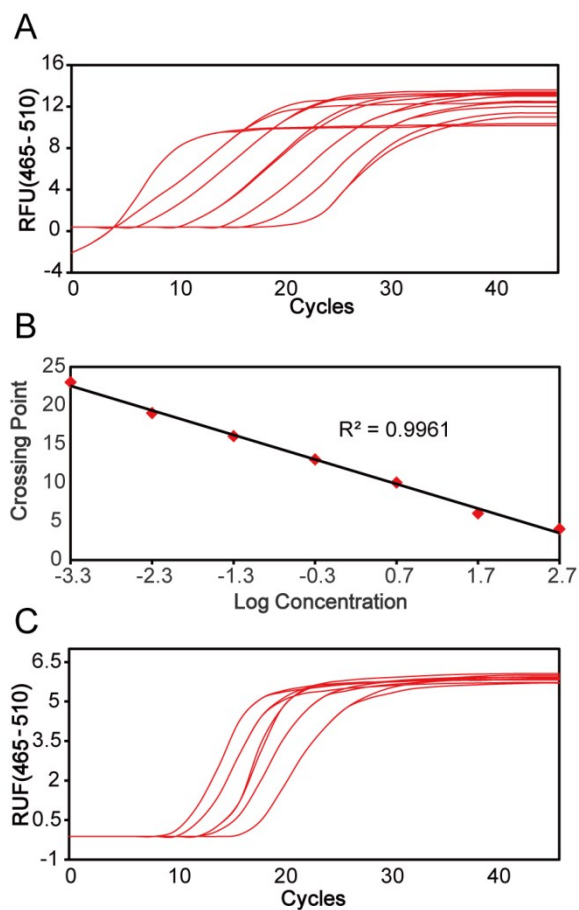

13

14 **Figure S1.** Determination of the dissociation constant of  $\beta$ A-1 by fluorescence quantitative PCR. (A)

15 Standard amplification curve generated from a dilution series of  $\beta$ A-1. (B) Standard curve between

16  $\log[\beta$ A-1] and CP value obtained from (A). (C) Amplification curves of samples with different

17 concentrations of  $\beta$  subunits.

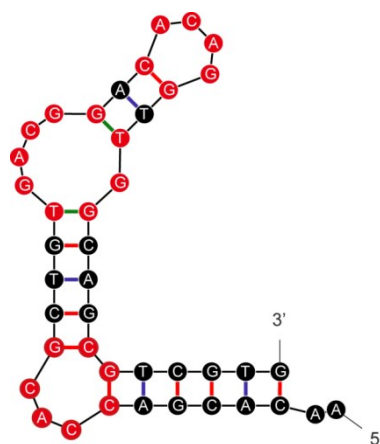

dG = -13.30 [Initially -13.30]  $\beta$ A-1

18

19 **Figure S2.** The secondary structure model of  $\beta$ A-1 aptamer predicted by the mfold program.

20 **Table S1. Oligonucleotide fragments detected with high repeatability in  $\beta$  subunit samples**

| Number | Sequence                                        | Repeat count | Proportion |
|--------|-------------------------------------------------|--------------|------------|
| 1      | AACACGACCACGCTGTGACGGACACAGGTTGGCAGCGT<br>CGTG  | 109,586      | 7.01%      |
| 2      | AACACGACGTAAGTTCGGCGGACGAACGATGCCAACGT<br>GGGC  | 23,759       | 1.52%      |
| 3      | AAGCCCACGTACCTGTGCCGGCCGAACACCGAGGCCGT<br>CGTG  | 16,321       | 1.04%      |
| 4      | AACACGACTTGACTGTGCTCATCACAGAATGTCACCGTG<br>GGC  | 8258         | 0.53%      |
| 5      | GAACACGACCACGCTGTGACGGACACAGGTTGGCAGCG<br>TCGTG | 6229         | 0.40%      |
| 6      | AACACGAAGCCCGAGCGAGTGGGC                        | 3810         | 0.24%      |
| 7      | AACACGACATGCCTGTGATAGTCGAACCCCGTGGCTGT<br>GGGC  | 3197         | 0.20%      |
| 8      | AACACACAGATCTGTGCCAGACACAGCATGAGCCCGTG<br>GGC   | 2801         | 0.18%      |
| 9      | AACACGACTCCACTGTGCGTCGCGAACTCTGCCACGGTC<br>GTG  | 2254         | 0.14%      |
| 10     | GAACACGACGTAAGTTCGGCGGACGAACGATGCCAACG<br>TGGGC | 2238         | 0.14%      |

21

22
